1 **Mosaic antimicrobial resistance/virulence plasmid in hypervirulent ST2096 *Klebsiella***  
2 ***pneumoniae* in India: The rise of a new superbug?**

3 Chaitra Shankar<sup>a†</sup>, Karthick Vasudevan<sup>a†</sup>, Jobin John Jacob<sup>a†</sup>, Stephen Baker<sup>b</sup>, Barney J Isaac<sup>c</sup>  
4 Ayyan Raj Neeravi<sup>a</sup>, Dhiviya Prabaa Muthuirulandi Sethuvel<sup>a</sup>, Biju George<sup>d</sup>, and Balaji Veeraraghavan<sup>1#</sup>

5 <sup>a</sup> Department of Clinical Microbiology, Christian Medical College and Hospital, Vellore, Tamil Nadu, India

6 <sup>b</sup> University of Cambridge School of Clinical Medicine, Cambridge Biomedical Campus, Cambridge, UK

7 <sup>c</sup> Department of Pulmonary Medicine, Christian Medical College and Hospital, Vellore, Tamil Nadu, India

8 <sup>d</sup> Department of Haematology, Christian Medical College and Hospital, Vellore, Tamil Nadu, India

9 **# Address correspondence to**

10 Dr. Balaji Veeraraghavan

11 Professor

12 Department of Clinical Microbiology, Christian Medical College, Vellore 632004,

13 Tamil Nadu, India

14 Email addresses: [vbajali@cmcvellore.ac.in](mailto:vbajali@cmcvellore.ac.in)

15 Phone No.: 0416 2282588

16 Mobile: +91 9442210555

17 Fax: 91(0)416-2232103

18 Running Head: Characterisation of hvKp carrying mosaic plasmid

19 **† Contribution:**

20 Chaitra Shankar, Karthick Vasudevan and Jobin John Jacob contributed equally to this manuscript

21 **Keywords**

22 Hypervirulent; *K. pneumoniae*; ST2096; Mosaic plasmid; CRISPR Cas; India

23 **Repositories**

24 The whole genome sequences of the present study isolates have been deposited in GenBank, NCBI,  
25 with accession numbers CP053765 - CP053770, CP053771 – CP053780, CP058798-CP058806,  
26 JAARNO010000001.1 - JAARNO010000005.1, JAAQSG000000000, JAARNJ000000000,  
27 JAARMH000000000 and JAAQTC000000000

28

29

## 30 **ABSTRACT**

31 Hypervirulent *K. pneumoniae* (HvKp) is typically associated with ST23 clone; however, hvKp is also  
32 emerging from clones ST11, ST15 and ST147, which are also multi-drug resistant (MDR). Here, we  
33 aimed to characterise nine novel MDR hvKp isolates harbouring mosaic plasmids simultaneously  
34 carrying antimicrobial resistance (AMR) and virulence genes. Nine HvKp isolates obtained from  
35 hospitalised patients in southern India were characterized for antimicrobial susceptibility and  
36 hypervirulence phenotypes. All nine hvKp isolates were subjected to whole genome sequencing  
37 (WGS) using Illumina HiSeq2500 and a subset of four were sequenced using Oxford Nanopore  
38 MinION. Among the nine isolates, seven were carbapenem-resistant, two of which carried *bla*<sub>NDM-5</sub> on  
39 an IncFII plasmid and five carried *bla*<sub>OXA-232</sub> on a ColKP3 plasmid. The virulence determinants were  
40 encoded in a mosaic plasmid (~320 Kbp) that formed as a result of its insertion in a IncFIB-IncHI1B  
41 plasmid co-integrate. The mosaic plasmid carried AMR genes (*aadA2*, *armA*, *bla*<sub>OXA-1</sub>, *msrE*, *mphE*,  
42 *sulI* and *dfrA14*) in addition to *rmpA2*, *iutA* and *iucABCD* virulence genes. Interestingly the mosaic  
43 plasmid carried its own type IV-A3 CRISPR-cas system that is likely able to target the acquisition of  
44 IncF plasmid with the help of a *traL* spacer. The convergence of virulence and AMR is the biggest  
45 threat among invasive *K. pneumoniae* infections. However, increasing reports of the presence of  
46 mosaic plasmid carrying both AMR and virulence genes suggests MDR-hvKp isolates are no longer  
47 confined to selected clones and the containment of such isolates is very challenging.

## 48 **IMPORTANCE**

49 *Klebsiella pneumoniae* is an opportunistic pathogen that commonly associated with hospital-acquired  
50 infections in the urinary tract, respiratory tract, lung, wound sites. The organism has gained notoriety  
51 by acquiring additional genetic traits to become either hypervirulent (HV) phenotype or multidrug  
52 resistant (MDR) phenotype. Though the infections by both these phenotypes were very challenging to  
53 treat, the MDR *K. pneumoniae* (MDR-Kp) were remained in the hospital settings while HV *K.*  
54 *pneumoniae* (hvKp) strains were mostly originated from the community settings. In a recent turn of  
55 events, the evolution of MDR-Kp and hvKp has converged as both clones found to carry both MDR  
56 plasmids and virulence plasmid. These convergent strains are challenging to treat and is associated  
57 with higher mortality rate. As the recent hvKp isolates harbour mosaic plasmid encoding both AMR

58 and virulence determinants there is a need to investigate the evolution of these pathogens. The  
59 significance of our research is in characterising the novel mosaic plasmid identified in MDR-hvKp  
60 isolates that belong sequence type (ST) 2096. Tracking the possible evolution pathway of MDR-  
61 hvKPs would greatly help in the proper surveillance and management of this superbugs.

## 62 **INTRODUCTION**

63 Hypervirulent *K. pneumoniae* (HvKp) is becoming more prevalent globally and being associated with  
64 an increasing number of fatalities (1, 2). Early reports of hvKp highlighted an association with liver  
65 abscesses, but more recent reports have documented infections in various internal sites in patients  
66 without liver abscesses (3,4). HvKp isolates were documented to be limited in their antimicrobial  
67 resistance (AMR) phenotypes because of a barrier for acquiring MDR plasmids (5). However, there  
68 has been the emergence of multidrug resistant (MDR) variants more recently (6). The acquisition of  
69 mobile genetic elements harbouring carbapenemases among hvKp isolates, or the uptake of pLVPK-  
70 like virulence plasmid in carbapenem resistant *K. pneumoniae* (CRKP) results in the dangerous  
71 convergence of carbapenem-resistant and hypervirulent phenotypes (7).

72 The population structure of hvKp, when assessed by multi-locus sequence typing (MLST) and whole-  
73 genome sequencing (WGS), indicates that most hvKp isolates belong to clonal groups (CG) 23, 65,  
74 86, 375, and 380 (8). Conversely, CRKP is associated with a clonal expansion of CG258 in Europe,  
75 while its endemic dissemination in Asia is associated with ST11, ST14, ST147, ST149, and ST231  
76 (9). The convergence of AMR and virulence, irrespective of the clonal group, has transformed *K.*  
77 *pneumoniae* into a group pathogen that cause serious infections with very limited treatment options  
78 (10).

79 Convergent strains of carbapenem-resistant hypervirulent *K. pneumoniae* (CR-hvKp) have undergone  
80 frequent genetic transposition through the formation of a fusion/co-integrate or mosaic plasmid (11).  
81 Notably, these mosaic plasmid are typically composed of two different plasmid backbones and  
82 generate the potential for AMR and virulence determinants to be encoded within a single plasmid  
83 (12). Similar mosaic plasmid with diverse backbones carrying IncFIB-IncHI1B, IncFIBK-IncHI1B,  
84 IncFIB-IncR have been reported in China (11, 13, 14). These emerging HvKp are extremely

85 concerning as these superbugs have the potential to cause devastating hospital outbreaks (15, 16).  
86 Understanding of the diversity of mosaic plasmid held within CR-hvKp isolates is currently limited  
87 due to a lack of completely assembled circular plasmids. Here, we characterised nine MDR ST2096  
88 hvKp carrying mosaic plasmid that simultaneously encoded both antimicrobial resistance and  
89 virulence genes. The complete genome sequence of a subset of four isolates were further characterised  
90 aiming to elucidate the structure of mosaic plasmid through comparative genomics.

## 91 **MATERIALS AND METHODS**

### 92 *Bacterial isolates*

93 The nine studied *K. pneumoniae* were isolated from patients with bacteraemia admitted to Christian  
94 Medical College, Vellore, India in 2019. The isolates were identified using standard biochemical  
95 methods and further confirmed by Vitek-MS (Database v2.0, bioMerieux, France). The isolates were  
96 screened for a hypermucoviscous phenotype using the string test (2). In addition, the mucoid  
97 phenotypic genes *rmpA* and *rmpA2* were screened using PCR, as described previously (17,18). The  
98 demographic and clinical details of the nine patients were collected from electronic medical records  
99 maintained at the Hospital. The study was approved by Institutional Review Board of Christian  
100 Medical College, Vellore with minute number 9,616 (01/09/2015).

### 101 *Antimicrobial susceptibility testing*

102 Antimicrobial susceptibility testing (AST) was performed by Kirby Bauer disc diffusion method  
103 according to CLSI 2019 guidelines (19). The tested antimicrobials were, cefotaxime (30µg),  
104 ceftazidime (30µg), piperacillin/tazobactam (100/10µg), cefoperazone/sulbactam (75/30µg),  
105 imipenem (10µg), meropenem (10µg), ciprofloxacin (5µg), levofloxacin (5µg), amikacin (30µg),  
106 gentamicin (10µg) and minocycline (30µg). The minimum inhibitory concentration (MIC) against  
107 Meropenem was determined by broth micro dilution (BMD). *Escherichia coli* ATCC 25922,  
108 *Enterococcus faecium* ATCC 29212 and *Pseudomonas aeruginosa* ATCC 27853 were used as the  
109 quality control strains for AST. AST results were interpreted according to CLSI guidelines (20).

110

111 *DNA extraction and genome sequencing*

112 The study isolates were revived from the archive at Department of Clinical Microbiology and single  
113 isolated colony was grown in LB broth (Oxoid, Hampshire, United Kingdom) at 37°C. Total genomic  
114 DNA was extracted from the pelleted cells using Wizard DNA purification kit (Promega, WI, USA)  
115 as per the manufacturer's protocol. Extracted DNA was quantified using NanoDrop One  
116 spectrophotometry (Thermo Fisher Scientific, MA, USA) and Qubit 3.0 fluorometry (Life  
117 Technologies, CA, USA) and stored at -20°C until further use.

118 Sequencing library was prepared using the Nextera DNA Flex library preparation kit (Illumina, San  
119 Diego, CA). as per the manufacturer's instructions. Subsequently the paired end library was subjected  
120 to sequencing on a HiSeq 2500 platform (Illumina, USA) generating 2 x 150-bp reads. Sequencing  
121 reads with a PHRED quality score below 20 were discarded and adapters were trimmed using  
122 cutadapt v1.8.1 and assessed with FastQC v0.11.4. For a subset of four isolates, long read sequencing  
123 was carried out using Oxford Nanopore MinION platform with FLO-MIN106 R9 flow cell (Oxford  
124 Nanopore Technologies, Oxford, UK). Long read DNA library was prepared using the SQK-LSK108  
125 ligation sequencing kit (v.R9) along with ONT EXP-NBD103 Native Barcode Expansion kit  
126 following the manufacturer's protocol (Oxford Nanopore Technologies, Oxford, UK). The library was  
127 loaded onto the flow cells, run for 48 hrs using the standard MinKNOW software. The Fast5 files  
128 generated from MinION sequencing were subjected to base calling using Guppy  
129 (<https://github.com/gnatsanet/ONT-GUPPY>).

130 *Genome assembly and evaluation*

131 Draft genome sequence data generated using Illumina were assembled using SPAdes (v.3.13.0)  
132 (21). For a subset of four isolates complete and highly accurate assembly was achieved using hybrid  
133 *de novo* assembly approach (22). The nanopore long reads were error-corrected with the standalone  
134 Canu error correction tool (v.1.7) and assembled using the Unicycler hybrid assembly pipeline (v  
135 0.4.6) with the default settings (23, 24). The obtained genome sequence was polished using high  
136 quality Illumina reads as described previously (25). The assembled complete genome was subjected to  
137 quality assessment using CheckM v1.0.5 (26) and Quast v4.5 (27). CheckM estimated the

138 completeness and contiguity while Quast was used to detect mis-assemblies, mismatches and indels  
139 by aligning the assemblies with the reference genome, *K. pneumoniae* NTUH-K2044 (AP006725).  
140 Since *K. pneumoniae* NTUH-K2044 is a well characterised- type strain of ST23 hypervirulent *K.*  
141 *pneumoniae*, it was used as the reference genome.

#### 142 *Genome analysis*

143 Genome assemblies were submitted to NCBI GenBank and annotated using the Prokaryotic Genome  
144 Annotation Pipeline (PGAP v.4.1) from NCBI (28). The resistance profile of the assembled genome  
145 sequences was Resfinder 4.1 available from CGE server (<https://cge.cbs.dtu.dk/services/ResFinder/>).  
146 Similarly, the presence of plasmids in the genomes was identified and characterized using  
147 PlasmidFinder (v.1.3) available at CGE server (<https://cge.cbs.dtu.dk/services/PlasmidFinder>).  
148 Further, MLST and virulence locus (yersiniabactin, aerobactin and other siderophore production  
149 systems) were identified using Kleborate (v.2.0.0) (<https://github.com/katholt/Kleborate>) (29). The  
150 presence of virulence factors were confirmed using virulence database at Pasteur Institute for *K.*  
151 *pneumoniae*  
152 ([https://bigsdbs.pasteur.fr/cgi-bin/bigsdbs/bigsdbs.pl?db=pubmlst\\_klebsiella\\_seqdef\\_public&page=sequenceQuery](https://bigsdbs.pasteur.fr/cgi-bin/bigsdbs/bigsdbs.pl?db=pubmlst_klebsiella_seqdef_public&page=sequenceQuery)). The K and O antigen loci were also identified using Kaptive available at Kleborate (30).  
153  
154 The final assembled circular chromosome and plasmid were visualized using CGview server v.1.0  
155 (31) and Easyfig (32). CRISPR regions in the genomes were identified with CRISPRCasTyper web  
156 server (<http://cctyper.crispr.dk>) (33). The genetic distance between the isolates were calculated using  
157 average nucleotide identity (ANI) available at OrthoANI (34). Pairwise distance between the nine  
158 isolates were determined with BA10835 as reference using SNP-dists v 0.6.3 (34) from the raw reads  
159 (<https://github.com/tseemann/snp-dists>) as described previously (35).

## 160 **RESULTS**

### 161 *Clinical manifestations and microbiological characteristics of isolates*

162 The demographic and clinical details of the patients with hvKp bacteraemia are shown in Table 1. The  
163 nine selected *K. pneumoniae* isolates were resistant to all tested antimicrobials by disc diffusion and  
164 were initially considered to be extensively drug resistant (XDR). However, on determining MIC, one  
165 of the isolates was found to be susceptible to meropenem (MIC  $\leq 0.5\mu\text{g/ml}$ ). All organisms generated

166 a negative string test, but were positive for the *rmpA2* gene by PCR. Based on MLST, all nine *K.*  
167 *pneumoniae* isolates belonged to ST2096, a single locus variant of ST14. The surface capsule (K) loci  
168 were predicted to be K64 and the O-antigen encoding loci was determined to be O1v1 in all isolates.

169 The pairwise average nucleotide identity (ANI) between the nine draft genomes showed >99.80%  
170 similarity (Suppl Fig. 1a). Pairwise SNP difference between the nine study isolates identified the two  
171 clusters of strains with isolates BA10835 and BA27935 being >260 SNP distant from the remaining  
172 seven (Suppl Fig 1b). Among the cluster containing 7 isolates, strain BA10334 and BA1602 were  
173 closely related (2 SNPs) so does strain BA25425 and BP3636. Our analysis was successful in  
174 identifying a possible two outbreaks of ST2096 in the hospital settings though more details are  
175 required to confirm our hypothesis.

#### 176 *Antimicrobial resistance determinants*

177 The AMR determinants of four complete genomes are listed in Table 2 and five draft genomes are  
178 listed in Table 3. The nine hvKp isolates were found to possess an array of AMR genes associated  
179 with multiple plasmids (Table 2 and Table 3). Atypically, we found that 3/4 isolates with complete  
180 genomes had *aac(6')-lb-cr*, *bla<sub>OXA-1</sub>* and *dfrA1*, integrated into chromosome on mobile genetic  
181 elements. Specifically, *aac(6')-lb-cr* and *bla<sub>OXA-1</sub>* were associated with an IS26 and were inserted in  
182 the middle of the chromosome at position ~2.3Mbp, while *dfrA1* was associated with an IS*Kpn26* and  
183 class 1 integron and was inserted at position ~5.3Mbp. Additionally, a duplicate region of 7bp  
184 (AGTCCGT) flanked the AMR genes where IS26 was inserted (**Figure 1**). Two isolates (BA10835  
185 and BA27935) were also found to carry *bla<sub>NDM-5</sub>* on IncFII plasmid and one isolate (BP3636) carried  
186 *bla<sub>OXA-232</sub>* on ColKp3 plasmid. The fourth isolate, BA32040, which was susceptible to meropenem,  
187 lacked a carbapenemase encoding gene.

#### 188 *Plasmids*

189 All nine isolates each carried either four or five plasmids including a virulence plasmid. The plasmids  
190 and their associated ARGs as deduced by complete genomes of four isolates are shown in Table 2.  
191 Notably, *bla<sub>NDM-5</sub>* was carried on IncFII plasmid (~97Kbp) along with additional ARGs such as  
192 *aadA2*, *rmtB*, *ermB*, *mphA*, *sul1*, *dfrA12* and *bla<sub>TEM-1</sub>* (**Figure 2**). We also found a segment of IS30

193 family transposase of 293bp, with identity similar to *ISAbal25* adjacent to *bla<sub>NDM-5</sub>*. The closest  
194 matching plasmid from a global database was from *K. pneumoniae* JUNP 055 (LC506718), which  
195 also harboured *bla<sub>NDM-5</sub>*. This plasmid (LC506718) shared ~80% sequence identity to that of *E. coli*  
196 M105 (AP018136), which lacked *bla<sub>NDM-5</sub>*.  
197 An additional large (~307Kbp) plasmid was present in all four genomes subjected to hybrid assembly  
198 and was a fusion of IncFIB and IncHI1B backbones and carried both ARGs and HvKp virulence  
199 genes (Table2). However, this plasmid was found to be shorter in BA32040 (272Kbp) and lacked the  
200 *aadA2*, *arma*, *bla<sub>OXA-1</sub>*, *msrE*, *mphE*, *sul1* and *dfrA14* ARGs in comparison to plasmids in the other  
201 three HvKp. Two plasmids in the study isolates, Col (BS512) and ColRNAI, did not possess any  
202 ARGs. Our data suggest that all the nine HvKp harboured a virulence plasmid which was a fusion of  
203 IncHI1B and IncFIB (Table 2 and Table 3).

#### 204 *Virulence*

205 The key virulence determinant carried by the chromosome of *K. pneumoniae* is the *ybt* locus, which is  
206 mobilized by ICEKp. In all the nine isolates, *ybt14* was carried on ICEKp5 and integrated into the  
207 chromosome. Yersiniabactin receptors, such as *fyuA* and *irp1*, were also present on the chromosome,  
208 along with an alternative *kfu* gene cluster encoding for iron uptake and *mrk* gene cluster which  
209 facilitates biofilm formation.

210 The presence of a large mosaic virulence plasmid of ~307Kbp was the hallmark of these ST2096  
211 isolates with key virulence determinants, such as *rmpA2* and aerobactin siderophore, which is encoded  
212 by *iucABCD* and *iutA* coding for its receptor. Notably, a frameshift mutation was observed in *rmpA2*  
213 among all the isolates which presumably was associated with a negative string test result. **Figure 3a**  
214 shows a comparison of mosaic plasmid from the present study with those previously reported *K.*  
215 *pneumoniae* belonging to diverse sequence types. As depicted in **Figure 3b**, the large mosaic plasmid  
216 from the study isolates were compared with IncFIB-IncHI1B co-integrate plasmid (CP006799 and  
217 AP018748) as well as the reference virulence plasmid (pLVPK: AY378100.1). In addition to the  
218 virulence genes, the mosaic virulence plasmid also carried genes encoding heavy metal resistance;  
219 *merARCTP* (mercury) and *terBEDWXZ* (tellurium).

#### 220 *CRISPR-Cas system*



221 From the nine-draft genome sequence, we found the occurrence of type I-E CRISPR and type IV-A3  
222 CRISPR system in each genome (**Figure 4**). Based on the information gathered from the four  
223 complete genome sequence, Type I-E CRISPR-Cas system was carried by the chromosome and type  
224 IV-A3 system is located on the mosaic plasmid. The number of spacers ranged from 7 to 12, which  
225 were 32bp in length. Adjacent to the CRISPR array was *ISKpn26*. These plasmid CRISPR regions  
226 were characterized by the presence of 5-12 spacers and a 29bp repeat region. One spacer each from  
227 the mosaic plasmid of the three isolates was similar to *traL* of IncF plasmids found in *K. pneumoniae*.

## 228 **DISCUSSION**

229 The evolution of *K. pneumoniae* clinical isolates by the acquisition of multiple resistance  
230 plasmids has placed this species among the most important causative agent of nosocomial  
231 infections. These highly challenging MDR-Kp or CR-Kp isolates is majorly associated with  
232 the NDM or/and OXA-48-like carrying ST11, ST14, ST15, ST101, ST147, ST395 and  
233 ST231 in Asia and KPC harbouring ST258 in North America and Europe (36).

234 Simultaneously, the classical *K. pneumoniae* (CKp) has acquired pLVPK-like virulence  
235 plasmid to become the hvKp that induces the community-acquired invasive infections (37).

236 The hypervirulent phenotypes were mainly clustered into the clonal group CG23, which  
237 includes the sequence types ST23, ST26, ST57, and ST163 (38). This bidirectional  
238 convergence of divergently evolved populations resulted in the emergence of MDR-  
239 hvKp/CR-hvKp isolates within the nosocomial clones. The outbreak of nosocomial clones  
240 carrying virulence plasmid is a matter of major public health concern (39-41).

241 Among the nosocomial MDR clones, at present ST11 (15, 39), ST14 (42), ST15 (10, 43),  
242 ST231 (44), ST36 (45), ST437 (46) and ST2096 (44, 47) were reported to have acquired the  
243 pLVPK-like virulence plasmid. Rapid acquisition of virulence plasmid by these nosocomial  
244 clones in the last few years suggests these clones are now ready for nosocomial and health  
245 care associated outbreaks (15, 39). The present study data also support the concept of the  
246 increasing number of nosocomial infections due to the convergent hvKp clones (Table 1).

247 Such unexpected emergence of MDR-hvKp ST2096 carrying ARGs and virulence genes in a  
248 fusion plasmid is extremely problematic (15).

249 The recent reports of the independent emergence of convergent hvKp isolates with mosaic  
250 plasmid in multiple geographical locations has made these organisms the latest superbug (2).

251 The complete genome sequence of four study isolates resolved the plasmid structure and  
252 identified four plasmids each among the isolates except for strain BA10835 that carried five  
253 plasmids (Table 2). The ~30 kb mosaic plasmid carrying both virulence and resistance  
254 determinants were comparable to previously reported fusion plasmids CM007852 CP034201,  
255 CP040726 (12) and MK649825 (44). Remarkably, these reference plasmids except  
256 MK649825 were from a diverse collection of clones (i.e. ST147 and ST383), which were  
257 found to harbour NDM and OXA-48 resistance genes. Moreover, the insertion of resistance  
258 cassette carrying ARGs such as *aadA2*, *armA*, *bla*<sub>TEM-1B</sub>, *bla*<sub>CTX-M-15</sub>, *mphE*, *msrE*, *sul1* and  
259 *dfrA12* of mosaic plasmid of independent origin are of serious concern. Interestingly the  
260 mosaic plasmid of Indian origin found to be fusion of IncFIB<sub>K</sub>/ IncHI1B backbone while the  
261 reference plasmids were emerged as a result of the fusion process of IncFII<sub>K</sub> and IncFIB<sub>K</sub>  
262 backbones (10, 12). The similarity among the plasmids with different backbones was  
263 attributed to the complement ARGs, MGEs and virulence genes encoded by them. Among  
264 these hvKp that harbours the fusion plasmids, mosaic structures were formed by the likely  
265 integration of virulence region from the hv plasmid into IncF-IncH co-integrate resistance  
266 plasmid (48). Diagrammatic representation of the possible evolution pathway of MDR-hvKP  
267 harbouring mosaic plasmid is represented in **Figure 5**.

268 We additionally found that the MDR-hvKp clones carrying mosaic virulence plasmid,  
269 possessed *rmpA2* alone without *rmpA*. This observation requires further investigation to  
270 determine the mode of acquisition and the stability of *rmpA* and *rmpA2* in this mosaic  
271 plasmid. The virulence plasmid found here also carried genes encoding heavy metal

272 resistance, such as tellurium and mercury. Given the community origin of hvKp strains, the  
273 co-occurrence of heavy metal resistance is likely to provide an additional survival mechanism  
274 in harsh ecological niches (49).

275 The presence of CRISPR-cas systems in MDR plasmids in *K. pneumoniae* have not been  
276 studied extensively. However, recent reports of Type IV CRISPR-Cas system in *K.*  
277 *pneumoniae* mega plasmids/ co-integrate plasmids suggest the role of this system in the  
278 competition between plasmids (50, 51). The acquisition of spacers that match with *traL* of  
279 conjugative plasmids by *K. pneumoniae* mosaic plasmids suggest the specific targeting of the  
280 further invasion of plasmid (51). The attainment of specific plasmid CRISPR spacers  
281 targeting different conjugative plasmids appear to be inevitable in *K. pneumoniae* to mitigate  
282 the fitness cost associated with carrying multiple AMR plasmids. Notably majority of the  
283 plasmids that carried plasmid targeting spacers are co-integrate plasmids carrying IncFIB and  
284 IncHI1B replicon (50, 51). This suggest that the plasmid mediated CRISPR spacers not only  
285 targets other plasmids but also likely to aid in the formation of co-integrate/ mega plasmids  
286 for improved stability and compatibility. The presence of such CRISPR-cas system in our  
287 mosaic plasmid further suggest their possible role in the homologous recombination or  
288 integration of AMR and virulence determinants in a single plasmid.

289 Globally, the prevalence of MDR HvKp or CR- HvKp appears to be increasing throughout  
290 the past few years. Given the high number of MDR-HvKp and CR-HvKp infections in China,  
291 India and Southeast Asia, this region represents the most likely hotspot of MDR virulence  
292 overlap and subsequent spread. Similarly, the spontaneous emergence of mosaic plasmids in  
293 these regions and its clonal spread in the healthcare setting clearly reflect the burden of these  
294 superbugs. If the incidence of the convergent clones with fusion plasmid continues, these  
295 pathotypes may be replacing the currently circulating CKPs to become the dominant clones.

296 Since these pathotypes are challenging to treat any further hospital infection outbreak will be  
297 fatal.

298 In India, with its high rates of AMR, it would be a potential healthcare disaster to generate  
299 hypervirulent *K. pneumoniae* carrying carbapenemases on a virulence plasmid. The acquisition of  
300 ARGs on the chromosome further poses the threat of intrinsic resistance among isolates rendering  
301 current empirical a major issue. The convergence of virulence and AMR and the presence of mosaic  
302 plasmid are the biggest threats among invasive *K. pneumoniae* infections. It is now apparent that  
303 MDR-HvKp isolates are no longer confined to select clones and the containment of such isolates with  
304 the mosaic plasmid is very challenging. The presence of AMR and virulence in among diverse  
305 *Klebsiella* clones presents a global threat for the rapid spread of these emerging superbugs.

306 **Author contributions:**

307 CS: Conceptualization, Analysis, manuscript writing and revising

308 KV: Methodology, Bioinformatics, manuscript writing

309 JJJ: Analysis, Manuscript writing and revising

310 SB: Manuscript correction and supervision

311 BJI: Resource

312 ARN: Methodology, data curation

313 DPMS: Methodology

314 BG: Resource

315 BV: Conceptualization, Manuscript Revision and Supervision

316 **Funding:**

317 The study has been funded by the Indian Council of Medical Research, New Delhi, India (ref. no:

318 AMR/Adoc/232/2020-ECD-II)

319 **Ethical approval:**

320 The study was approved by Institutional Review Board of Christian Medical College, Vellore, India,

321 with minute number 9,616 (01/09/2015).

322 **Conflict of Interest:** None

323 **References:**

- 324 1. Candace M Marr, Thomas A Russo. 2019. Hypervirulent *Klebsiella pneumoniae*: a new  
325 public health threat. *Expert Rev Anti Infect Ther* 17: 71-73.
- 326 2. Shon AS, Bajwa RP, Russo TA. 2013. Hypervirulent (hypermucoviscous) *Klebsiella*  
327 *pneumoniae*: a new and dangerous breed. *Virulence* 4: 107-18.
- 328 3. Rafat C, Messika J, Barnaud G, Dufour N, Magdoud F *et al.* 2018. Hypervirulent *Klebsiella*  
329 *pneumoniae*, a 5-year study in a French ICU. *J Med Microbiol* 67:1083-9.
- 330 4. Shankar C, Nabarro LE, Anandan S, Ravi R, Babu P *et al.* 2018. Extremely high mortality  
331 rates in patients with carbapenem-resistant, hypermucoviscous *Klebsiella pneumoniae* blood  
332 stream infections. *J Assoc Phys India* 66:13-6.
- 333 5. Marr CM, Russo TA. 2019. Hypervirulent *Klebsiella pneumoniae*: a new public health threat.  
334 *Expert Rev Anti Infect Ther* 17: 71-73
- 335 6. Lam MM, Wyres KL, Duchêne S, Wick RR, Judd LM *et al.* 2018. Population genomics of  
336 hypervirulent *Klebsiella pneumoniae* clonal-group 23 reveals early emergence and rapid  
337 global dissemination. *Nat Commun* 9:2703.
- 338 7. Turton JF, Payne Z, Coward A, Hopkins KL, Turton JA *et al.* 2018. Virulence genes in  
339 isolates of *Klebsiella pneumoniae* from the UK during 2016, including among carbapenemase  
340 gene-positive hypervirulent K1-ST23 and ‘non-hypervirulent’ types ST147, ST15 and ST383.  
341 *J Med Microbiol* 67:118-28.
- 342 8. Bialek-Davenet S, Criscuolo A, Ailloud F, Passet V, Jones L *et al.* 2014. Genomic definition  
343 of hypervirulent and multidrug-resistant *Klebsiella pneumoniae* clonal groups. *Emerg Infect*  
344 *Dis* 20:1812.
- 345 9. Lee CR, Lee JH, Park KS, Jeon JH, Kim YB *et al.* 2017. Antimicrobial resistance of  
346 hypervirulent *Klebsiella pneumoniae*: epidemiology, hypervirulence-associated determinants,  
347 and resistance mechanisms. *Front Cell Infect Microbiol* 7:483.
- 348 10. Lam MM, Wyres KL, Wick RR, Judd LM, Fostervold A *et al.* 2019. Convergence of  
349 virulence and MDR in a single plasmid vector in MDR *Klebsiella pneumoniae* ST15. *J*  
350 *Antimicrob Chemother* 74:1218-22.

- 351 11. Yang X, Dong N, Chan EW, Zhang R, Chen S. 2020. Carbapenem Resistance-Encoding and  
352 Virulence-Encoding Conjugative Plasmids in *Klebsiella pneumoniae*. Trends Microbiol.
- 353 12. Turton J, Davies F, Turton J, Perry C, Payne Z, Pike R. 2019. Hybrid resistance and virulence  
354 plasmids in “high-risk” clones of *Klebsiella pneumoniae*, including those carrying *bla*<sub>NDM-5</sub>.  
355 Microorganisms 7:326.
- 356 13. Li R, Cheng J, Dong H, Li L, Liu W *et al.* 2020. Emergence of a novel conjugative hybrid  
357 virulence multidrug-resistant plasmid in extensively drug-resistant *Klebsiella*  
358 *pneumoniae* ST15. Int J Antimicrob Agents 105952.
- 359 14. Xie M, Chen K, Ye L, Yang X, Xu Q *et al.* 2020. Conjugation of virulence plasmid in  
360 Clinical *Klebsiella pneumoniae* strains through formation of a fusion plasmid. Adv Biosyst  
361 4:1900239.
- 362 15. Liu C, Du P, Xiao N, Ji F, Russo TA, Guo J. 2020. Hypervirulent *Klebsiella pneumoniae* is  
363 emerging as an increasingly prevalent *K. pneumoniae* pathotype responsible for nosocomial  
364 and healthcare-associated infections in Beijing, China. Virulence 11: 1215-24.
- 365 16. Shankar C, Nabarro LE, Ragupathi NK, Sethuvel DP, Daniel JL, Veeraraghavan B. 2016.  
366 Draft genome sequences of three hypervirulent carbapenem-resistant *Klebsiella*  
367 *pneumoniae* isolates from bacteremia. Genome Announc 4.
- 368 17. Turton JF, Perry C, Elgohari S, Hampton CV. 2010. PCR characterization and typing  
369 of *Klebsiella pneumoniae* using capsular type-specific, variable number tandem repeat and  
370 virulence gene targets. J Med Microbiol 59:541-7.
- 371 18. Compain F, Babosan A, Brisse S, Genel N, Audo J *et al.* 2014. Multiplex PCR for detection  
372 of seven virulence factors and K1/K2 capsular serotypes of *Klebsiella pneumoniae*. J Clin  
373 Microbiol 52: 4377-80.
- 374 19. Versalovic J, Carroll KC, Funke G, Jorgensen JH, Landry ML, Warnock DW. 2011. Manual  
375 of clinical microbiology, ASM Press. Washington, DC.

- 376 20. Clinical and Laboratory Standards Institute. 2019. Performance standards for antimicrobial  
377 susceptibility testing; 29th informational supplement. M100-S29. Clinical and Laboratory  
378 Standards Institute, Wayne, PA
- 379 21. Bankevich A, Nurk S, Antipov D, Gurevich AA, Dvorkin M, *et al.* 2012. SPAdes: a new  
380 genome assembly algorithm and its applications to single-cell sequencing. *J Comput Biol*  
381 19:455-77.
- 382 22. Vasudevan K, Ragupathi NK, Jacob JJ, Veeraraghavan B. 2020. Highly accurate-single  
383 chromosomal complete genomes using IonTorrent and MinION sequencing of clinical  
384 pathogens. *Genomics* 112:545-51.
- 385 23. Koren S, Walenz BP, Berlin K, Miller JR, Bergman NH, Phillippy AM. 2017. Canu: scalable  
386 and accurate long-read assembly via adaptive k-mer weighting and repeat separation. *Genome*  
387 *Res* 27:722-36.
- 388 24. Wick RR, Judd LM, Gorrie CL, Holt KE. 2017. Unicycler: resolving bacterial genome  
389 assemblies from short and long sequencing reads. *PLoS Computat Biol* 13:e1005595.
- 390 25. Walker BJ, Abeel T, Shea T, Priest M, Abouelliel A, Sakthikumar S, *et al.* 2014. Pilon: an  
391 integrated tool for comprehensive microbial variant detection and genome assembly  
392 improvement. *PloS One* 9.
- 393 26. Parks DH, Imelfort M, Skennerton CT, Hugenholtz P, Tyson GW. 2015. CheckM: assessing  
394 the quality of microbial genomes recovered from isolates, single cells, and metagenomes.  
395 *Genome Res* 25:1043-55.
- 396 27. Gurevich A, Saveliev V, Vyahhi N, Tesler G. 2013. QUAST: quality assessment tool for  
397 genome assemblies. *Bioinformatics* 29: 1072-5.
- 398 28. Tatusova T, DiCuccio M, Badretdin A, Chetvernin V, Nawrocki EP, *et al.* 2016. NCBI  
399 prokaryotic genome annotation pipeline. *Nucleic Acids Res* 44:6614-24.
- 400 29. Lam M, Wick RR, Wyres KL, Holt KE. Kleborate: comprehensive genotyping of *Klebsiella*  
401 *pneumoniae* genome assemblies.
- 402 30. Wick RR, Heinz E, Holt KE, Wyres KL. 2018. Kaptive Web: user-friendly capsule and  
403 lipopolysaccharide serotype prediction for *Klebsiella* genomes. *J Clin Microbiol* 56(6).

- 404 31. Grant JR, Stothard P. 2008. The CGView Server: a comparative genomics tool for circular  
405 genomes. *Nucleic Acids Res* 36:W181-4.
- 406 32. Sullivan MJ, Petty NK, Beatson SA. 2011. Easyfig: a genome comparison visualizer.  
407 *Bioinformatics*. 27:1009-10.
- 408 33. Russel J, Pinilla-Redondo R, Mayo-Muñoz D, Shah SA, Sørensen SJ. 2020.  
409 CRISPRCasTyper: Automated Identification, Annotation, and Classification of CRISPR-Cas  
410 Loci. *CRISPR J*
- 411 34. Lee I, Kim YO, Park SC, Chun J. 2016. OrthoANI: an improved algorithm and software for  
412 calculating average nucleotide identity. *Int J Syst Evol Micr* 66:1100-3.
- 413 35. Wysocka M, Zamudio R, Oggioni MR, Gołębiewska J, Dudziak A, Krawczyk B. 2020. The  
414 New *Klebsiella pneumoniae* ST152 Variants with Hypermucoviscous Phenotype Isolated  
415 from Renal Transplant Recipients with Asymptomatic Bacteriuria—Genetic Characteristics  
416 by WGS. *Genes*. 11: 1189.
- 417 36. Lai YC, Lu MC, Hsueh PR. 2019. Hypervirulence and carbapenem resistance: two distinct  
418 evolutionary directions that led high-risk *Klebsiella pneumoniae* clones to epidemic success.  
419 *Expert Rev Mol Diagn* 19:825-37.
- 420 37. Chen L, Kreiswirth BN. 2018. Convergence of carbapenem-resistance and hypervirulence  
421 in *Klebsiella pneumoniae*. *Lancet Infect Dis* 18: 2-3.
- 422 38. Shankar C, Jacob JJ, Vasudevan K, Biswas R, Manesh A, *et al.* 2020. Emergence of  
423 Multidrug Resistant Hypervirulent ST23 *Klebsiella pneumoniae*: Multidrug Resistant Plasmid  
424 Acquisition Drives Evolution. *Front Cell Infect Microbiol* 10:719.
- 425 39. Gu D, Dong N, Zheng Z, Lin D, Huang M, *et al.* 2018. A fatal outbreak of ST11 carbapenem-  
426 resistant hypervirulent *Klebsiella pneumoniae* in a Chinese hospital: a molecular  
427 epidemiological study. *Lancet Infect Dis* 18: 37-46.
- 428 40. Zhan L, Wang S, Guo Y, Jin Y, Duan J, *et al.* 2017. Outbreak by  
429 hypermucoviscous *Klebsiella pneumoniae* ST11 isolates with carbapenem resistance in a  
430 tertiary hospital in China. *Front Cell Infect Microbiol* 7 :182.



- 431 41. Zhao Y, Zhang X, Torres VL, Liu H, Rocker A *et al.* 2019. An outbreak of carbapenem-  
432 resistant and hypervirulent *Klebsiella pneumoniae* in an intensive care unit of a major  
433 teaching hospital in Wenzhou, China. *Front Public Health* 7:229.
- 434 42. Mei YF, Liu PP, Wan LG, Liu Y, Wang LH, *et al.* 2017. Virulence and genomic feature of a  
435 virulent *Klebsiella pneumoniae* sequence type 14 strain of serotype K2 harboring *bla*NDM-5  
436 in China. *Front Microbiol* 8: 335.
- 437 43. Shu L, Dong N, Lu J, Zheng Z, Hu J, *et al.* 2019. Emergence of OXA-232 carbapenemase-  
438 producing *Klebsiella pneumoniae* that carries a pLVPK-like virulence plasmid among elderly  
439 patients in China. *Antimicrob Agents Chemother* 63.
- 440 44. Wyres KL, Nguyen TN, Lam MM, Judd LM, van Vinh Chau N, *et al.* 2020. Genomic  
441 surveillance for hypervirulence and multi-drug resistance in invasive *Klebsiella*  
442 *pneumoniae* from South and Southeast Asia. *Genome medicine*. 12: 1-6.
- 443 45. Feng Y, Lu Y, Yao Z, Zong Z. 2018. Carbapenem-resistant hypervirulent *Klebsiella*  
444 *pneumoniae* of sequence type 36. *Antimicrob Agents Chemother* 62(7).
- 445 46. Araújo BF, Ferreira ML, de Campos PA, Royer S, Gonçalves IR, *et al.* 2018. Hypervirulence  
446 and biofilm production in KPC-2-producing *Klebsiella pneumoniae* CG258 isolated in Brazil.  
447 *J Med Microbiol*. 67: 523-8.
- 448 47. Hala S, Antony CP, Alshehri M, Alsaedi A, Al Thaqafi OA, *et al.* 2020. An Emerging Clone  
449 (ST2096) of *Klebsiella pneumoniae* Clonal Complex 14 With Enhanced Virulence Causes an  
450 Outbreak in Saudi Arabia. *J Infect Public Health* 13: 363-4.
- 451 48. Tang M, Kong X, Hao J, Liu J. 2020. Epidemiological characteristics and formation  
452 mechanisms of multidrug-resistant hypervirulent *Klebsiella pneumoniae*. *Front Microbiol* 11:  
453 2774.
- 454 49. Furlan JP, Savazzi EA, Stehling EG. 2020. Genomic insights into multidrug-resistant and  
455 hypervirulent *Klebsiella pneumoniae* co-harboring metal resistance genes in aquatic  
456 environments. *Ecotoxicol. Environ. Saf.* 201:110782.
- 457 50. Newire E, Aydin A, Juma S, Enne VI, Roberts AP. 2020. Identification of a Type IV-A  
458 CRISPR-Cas System Located Exclusively on IncHI1B/IncFIB Plasmids in  
459 Enterobacteriaceae. *Front Microbiol* 11: 19

460 51. Kamruzzaman M, Iredell JR. 2020. CRISPR-Cas System in Antibiotic Resistance Plasmids in *Klebsiella pneumoniae*. Front Microbiol 10: 2934.

461 **Figures**

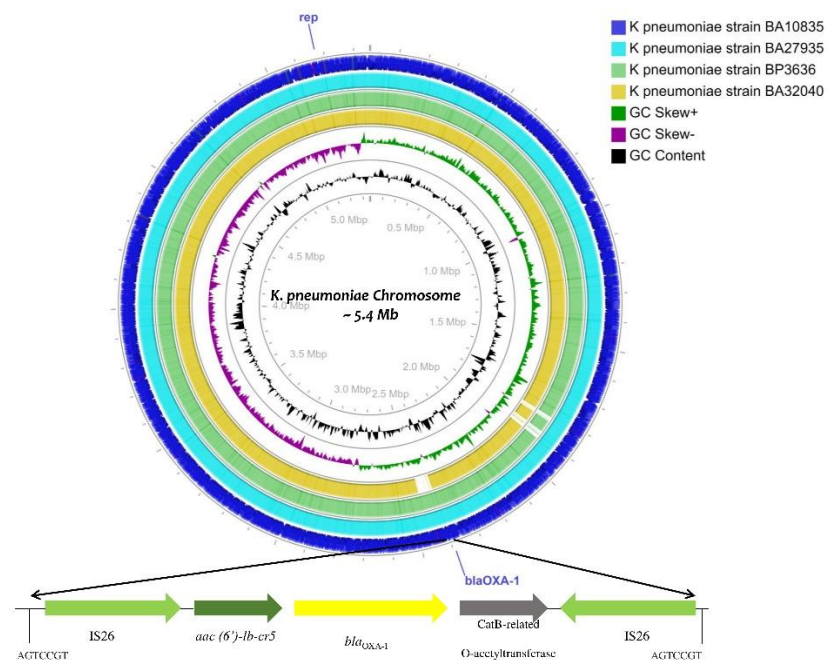

462

463 **Figure 1:** Circular genome maps of four ST2096 MDR hypervirulent *K. pneumoniae* chromosomes generated using CGview server (Grant and Stothard,  
464 2008). Circles from the outside to the inside show the CDS region of strain BA10835 (blue), strain BA27935 (Cyan), BP3636 (Green), BA32040  
465 (Yellow), GC skew (dark green and Magenta), GC content (black). Linear view of the IS26 mediated translocatable units carrying *aac(6)-Ib-cr*  
466 (fluoroquinolones and aminoglycosides), *bla<sub>OXA-1</sub>* (ampicillin), *catB3* (chloramphenicol) inserted to the chromosome. A repeat region of 7 bases read as  
467 AGTCCGT was present on either ends where the insertion was observed.

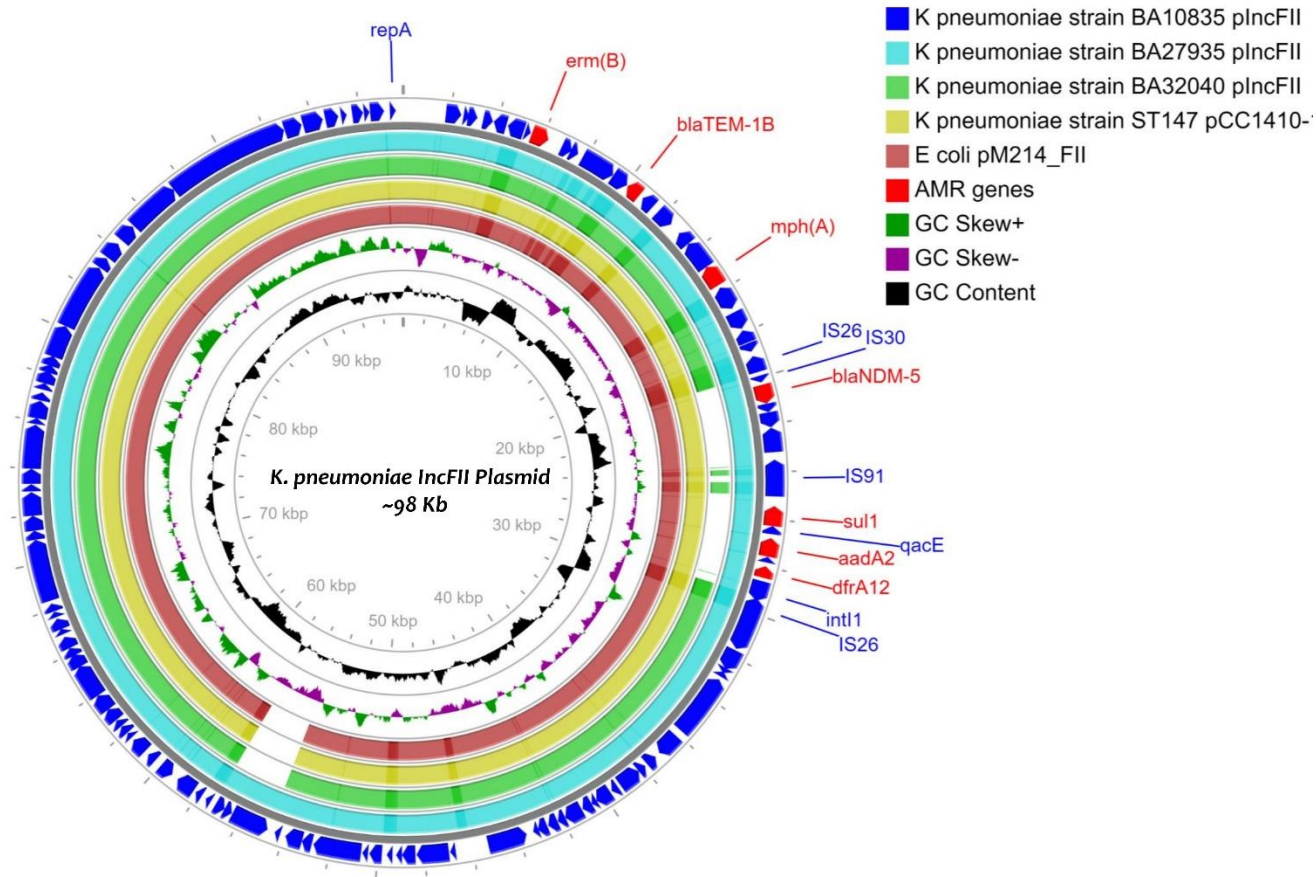

468

469 **Figure 2:** Circular genome maps of IncFII plasmids of three MDR hypervirulent *K. pneumoniae* belonging to ST2096 generated using CGview server.  
 470 Circles from the outside to the inside show the CDS region of strain BA10835 (blue), strain BA27935 (Cyan) and BA32040 (Green) and nearest matching  
 471 reference plasmids that belong to *K. pneumoniae* pCC1410-1 (Yellow; KT725788) and *E. coli* pM214 (Red; AP018144).GC skew (dark green and  
 472 Magenta), GC content (black) of the plasmid are represented in the inner circles. IncFII carries several antimicrobial resistance genes including *bla*<sub>NDM-5</sub>.

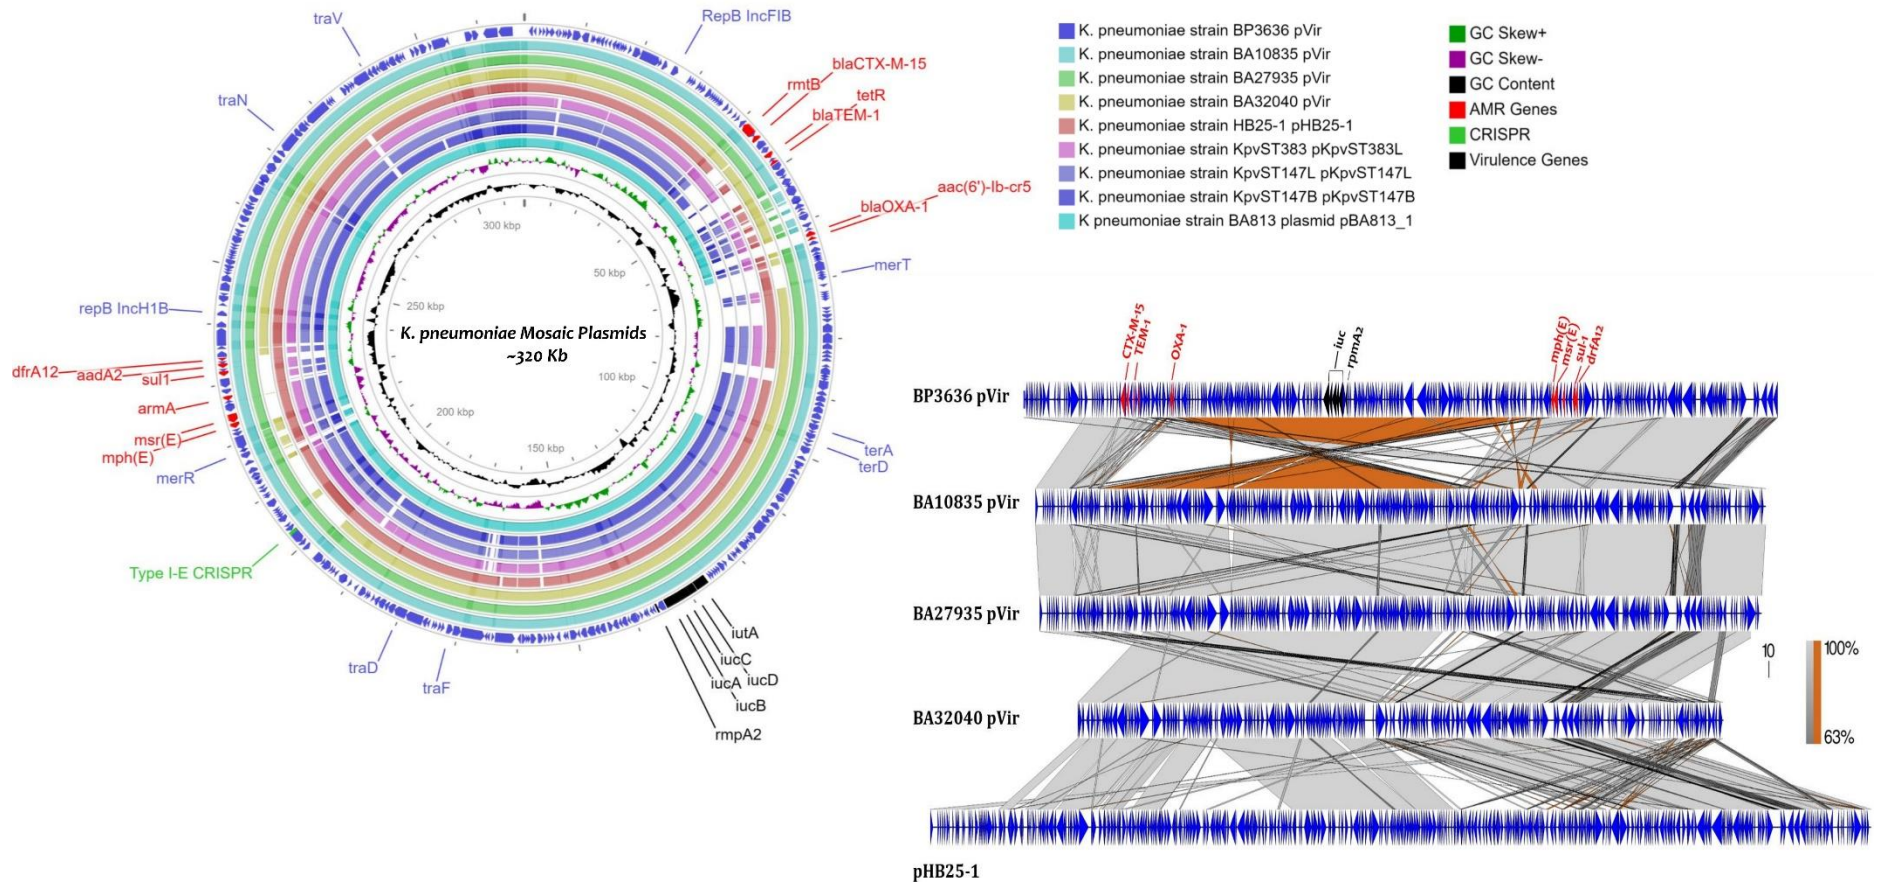

473

474 **Figure 3a:** Circular genome maps of mosaic plasmid generated using CGview server depicting the comparison of IncFIB-IncHIB-pVir mosaic plasmids  
 475 of strain BP3636 (Navy blue), strain BA10835 (Cyan), BA27935 (Green), BA32040 (Yellow) with previously reported mosaic plasmids pHB25-1  
 476 (CP039526; Red), pKpvST383L (CP034201; Pink), pKpvST147L (CM007852; Light blue), pKpvST147B (CP040726; blue), pBA813 (MK649825;  
 477 turquoise) from hvKp. Linear alignment prepared using Easyfig shows the comparison of mosaic plasmids with pHB25-1.

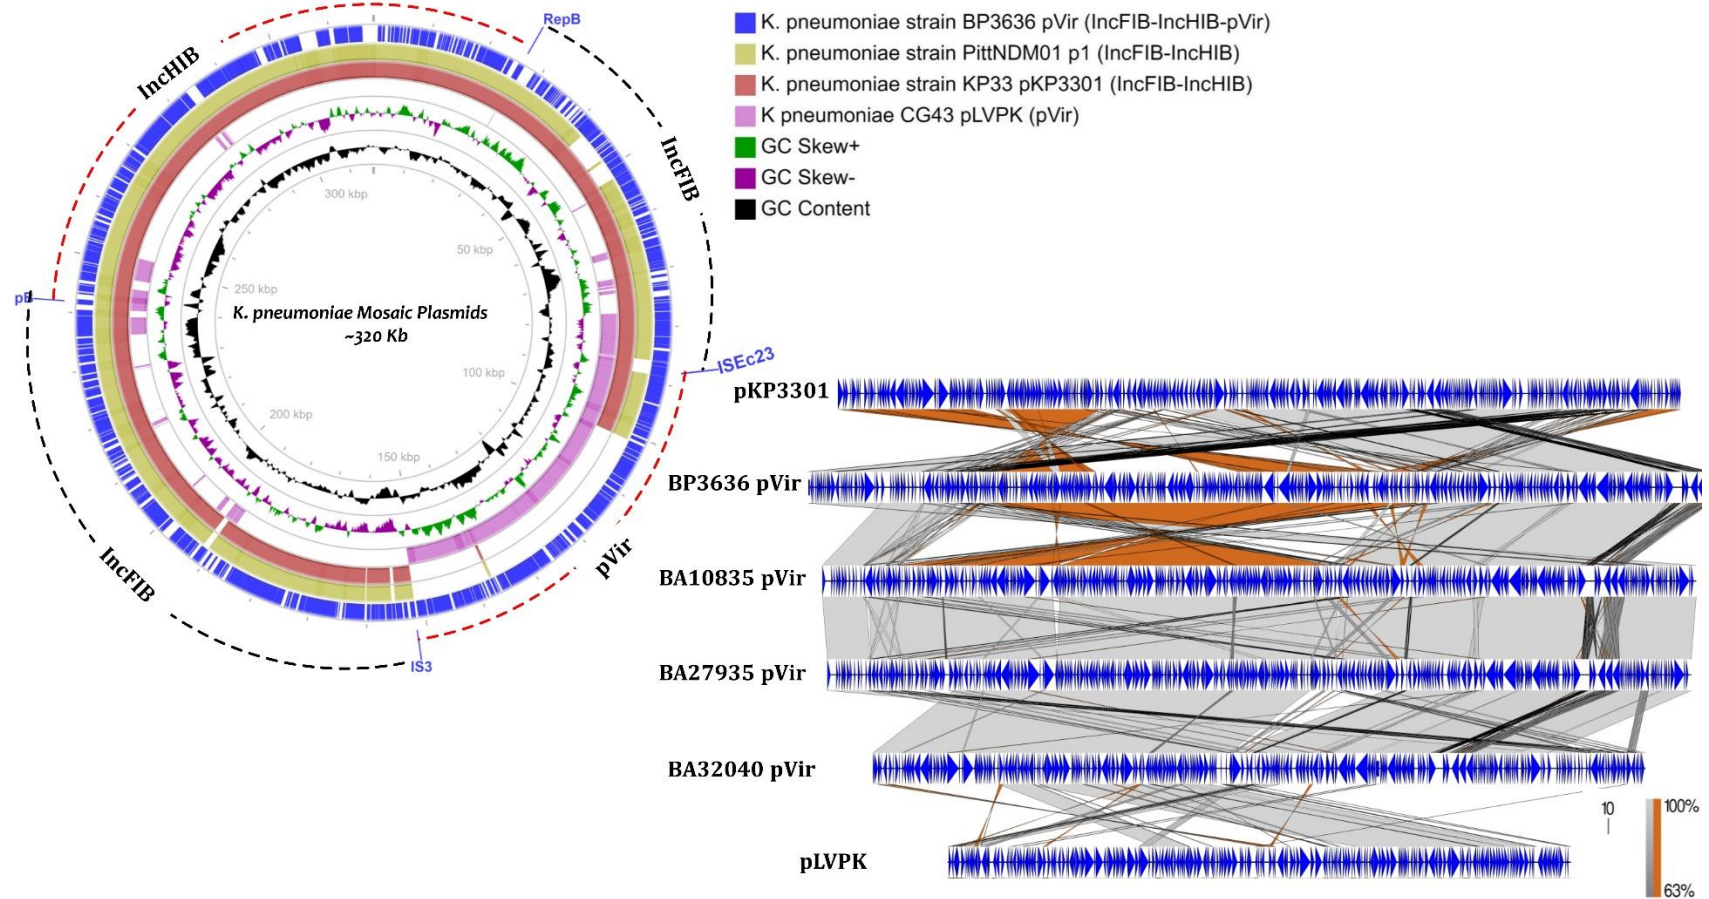

478

479 **Figure 3b:** Circular genome maps generated using CGview server depicting the comparison of IncFIB-IncHIB-pVir mosaic plasmids of strain BP3636  
 480 (Navy blue) with IncFIB-IncHIB backbone of plasmid p1 (CP006799), pKP3301 (AP018748) and virulence plasmid pLVPK (NC\_005249). Linear  
 481 alignment prepared using Easyfig shows the possible insertion of the virulence associated region from a pLVPK like plasmid into the IncFIB-IncHIB  
 482 backbone by means of transposases IS3 and IS66.

483

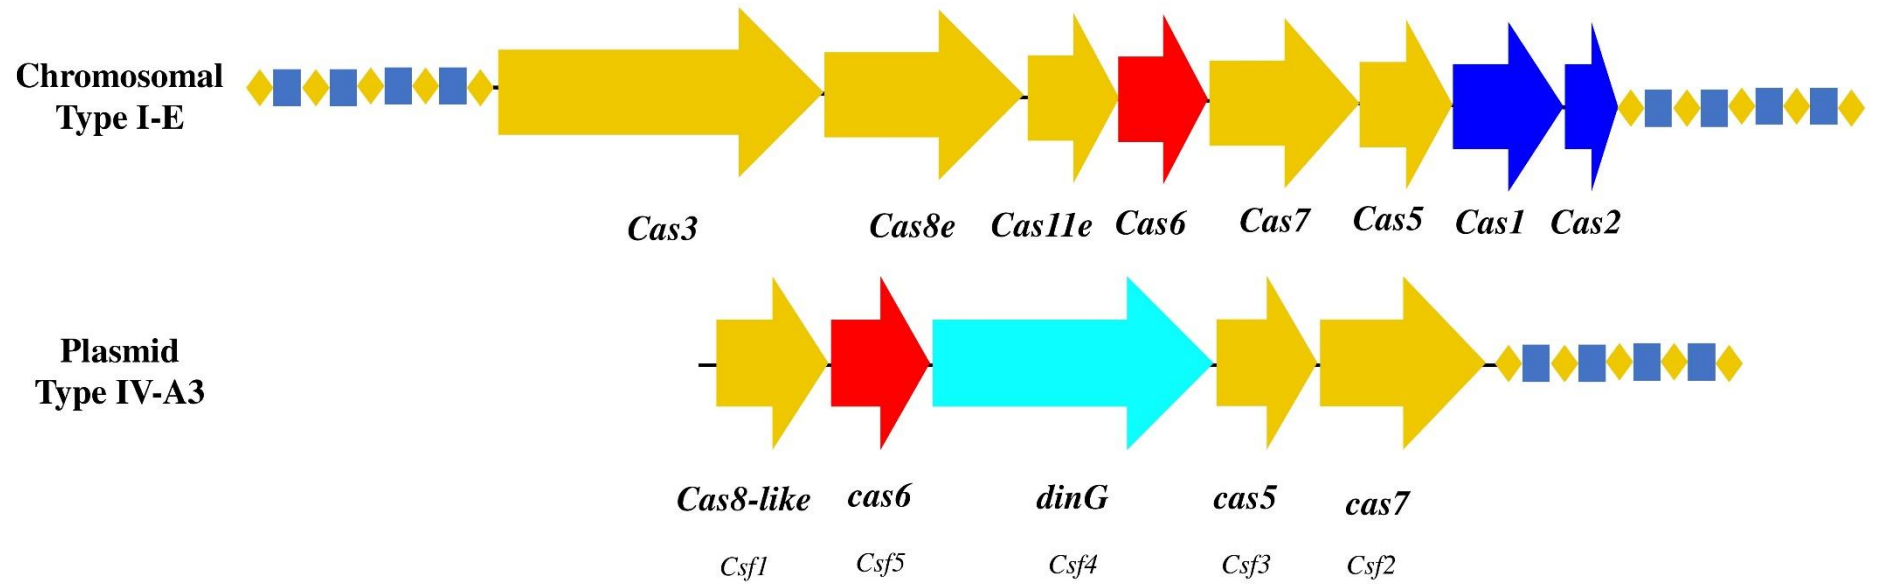

484

485 **Figure 4:** Schematic representation of the CRISPR-cas system associated with ST2096 MDR hypervirulent *K. pneumoniae* **a.** Gene organization of the  
486 chromosomal type I-E CRISPR-cas system. **b.** Gene organization of the plasmid associated type IV-A3 CRISPR-cas system. Genes are colour-coded and  
487 labelled according to the protein families as represented by CRISPRCasTyper web server.

488

489

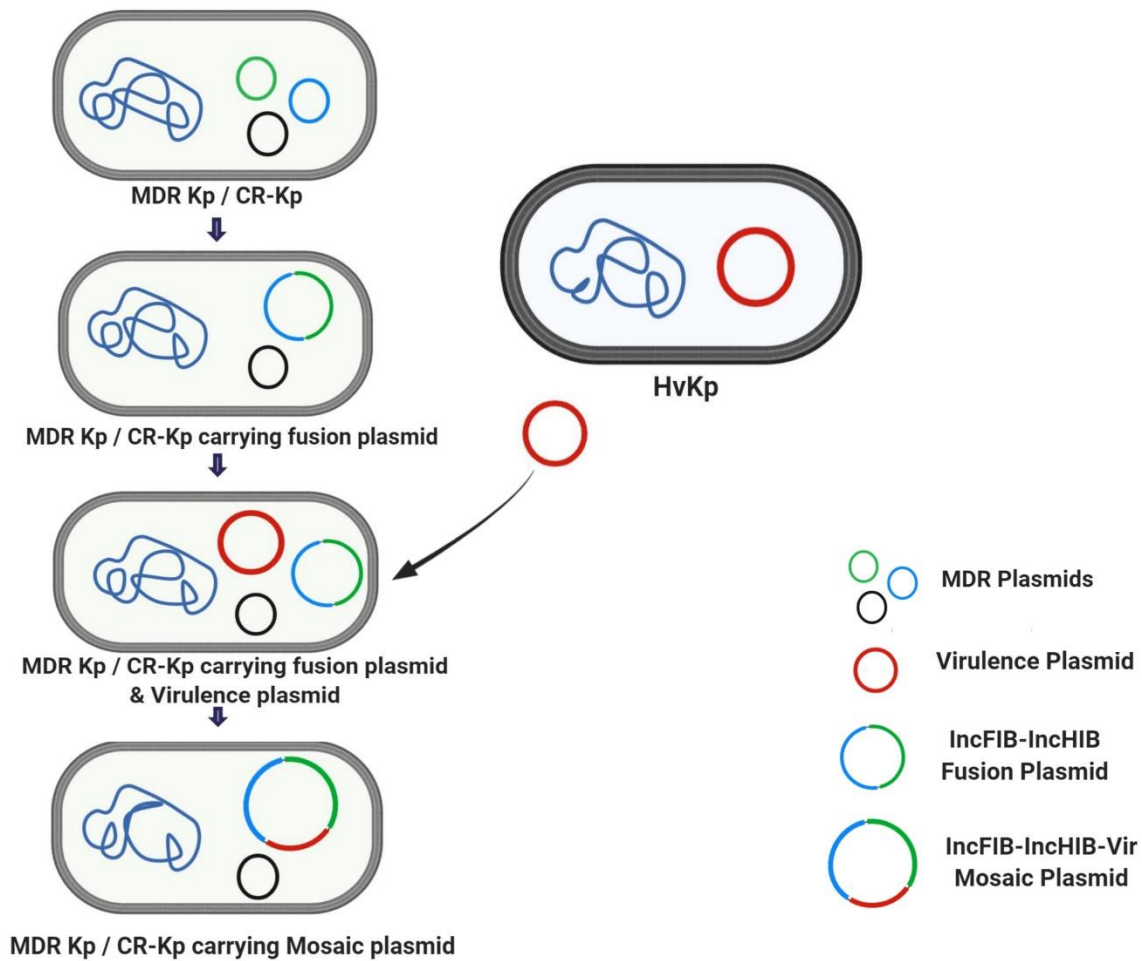

490

491 **Figure 5:** Schematic representation of the possible evolution pathway of ST2096 MDR hypervirulent *K. pneumoniae* mediated by mosaic plasmid. (1)  
 492 Formation of with IncFIB-IncHIB plasmid co-integrate by the fusion of both plasmid replicon (2) Acquisition of virulence plasmid from hvKp strains (3)  
 493 Formation and maintenance of mosaic plasmid by the integration of virulence associated region into the IncFIB-IncHIB fusion plasmid.

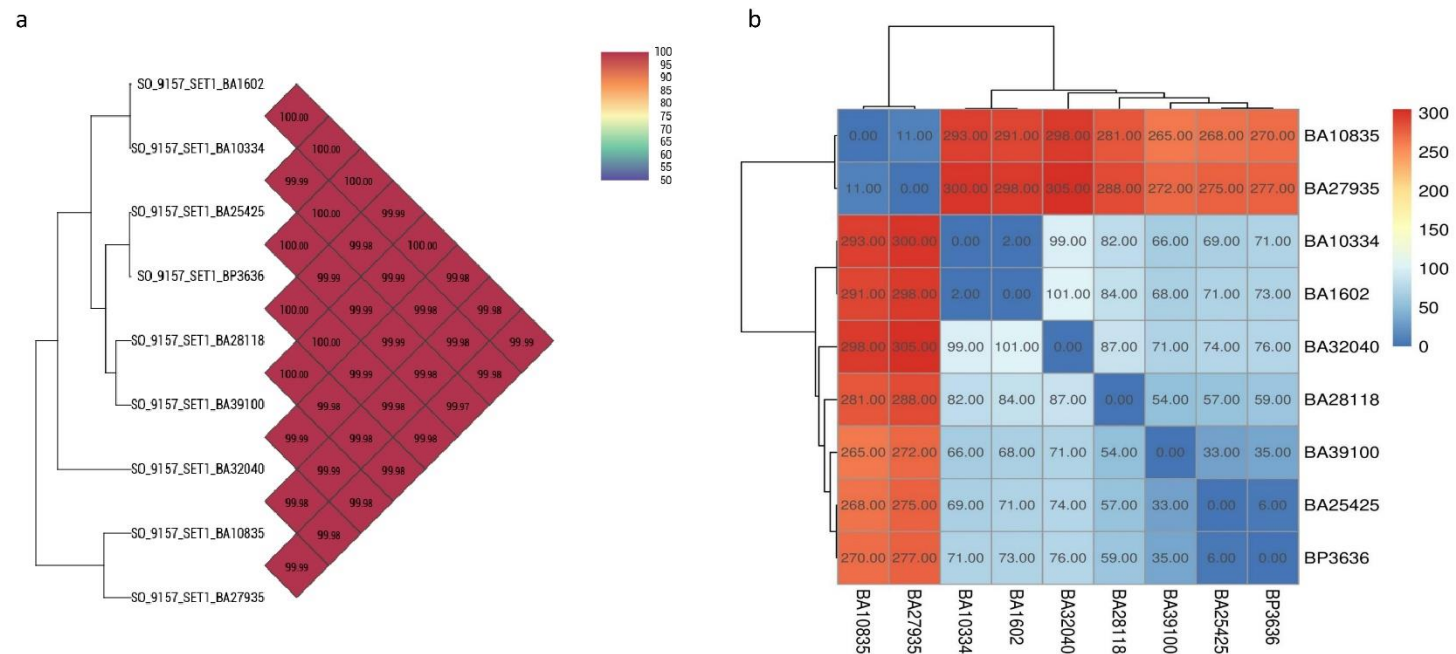

494

495 **Supplementary Figure 1a:** Average nucleotide index (ANI) of nine ST2096 MDR hypervirulent *K. pneumoniae* isolated generated using  
 496 OrthoANI. Heatmap generated from orthoANI values calculated from the OAT software. The nine study isolates formed two clusters of strains  
 497 with isolates BA10835 and BA27935 being distinct from the remaining seven. **1b:** Pairwise SNP distance table for all nine sequenced isolates  
 498 calculated using SNP-dists v 0.6.3 (<https://github.com/tseemann/snp-dists>). Pairwise SNP difference between the nine study isolates  
 499 identified two possible clusters of strains with isolates BA10835 and BA27935 being >260 SNP distant from the rest.



500 **Table 1.** The demographic and clinical details of the four patients with hypervirulent *K. pneumoniae* bacteraemia

| Micro no. | Month of isolation | Unit         | Clinical manifestation                               | Risk factors                                                            | Prior hospitalization              | Therapy                                                                       | Outcome                                    |
|-----------|--------------------|--------------|------------------------------------------------------|-------------------------------------------------------------------------|------------------------------------|-------------------------------------------------------------------------------|--------------------------------------------|
| BA10835   | April 2019         | Hepatology   | Acute febrile illness with Jaundice                  | Acute on chronic liver failure, Portal hypertension, Wilson disease     | No                                 | Tigecycline                                                                   | 1 month<br>Recovered                       |
| BA27935   | September 2019     | Casualty     | Acute febrile illness with altered sensorium         | Hypertension, Intracranial bleed Hemiplegia                             | Yes, Treated elsewhere for 10 days | Meropenem                                                                     | 1 day<br>Discharged against medical advice |
| BP3636    | March 2019         | Haematology  | Fever and giddiness                                  | Congenital sideroblastic anaemia , Stem cell transplant- Day 28         | Yes                                | Meropenem<br>Tigecycline<br>Fosfomycin<br>Colistin                            | 2 days<br>Succumbed to death               |
| BA32040   | October 2019       | Haematology  | Acute febrile illness                                | Beta Thalassemia Post allogenic Stem cell transplant- Day 280 Skin GVHD | Yes                                | Colistin<br>Meropenem                                                         | 15 days<br>Recovered                       |
| BA25425   | August 2019        | Neurosurgery | Road traffic accident - Head injury                  | Right subdural hematoma Temporal hemorrhagic contusion                  | Yes                                | Linezolid<br>Piperacillin-tazobactam<br>Cefoperazone- sulbactam<br>Gentamicin | 1 month<br>Succumbed to death              |
| BA28118   | September 2019     | Haematology  | Acute promyelocytic leukaemia<br>Acute Kidney Injury | Fever, multiple episodes of bleeding from gums/ per rectum              | No                                 | Meropenem, Tigecycline<br>Polymyxin B<br>Amikacin                             | 1 month<br>Recovered                       |

|         |            |                  |                                                                    |                                                             |                                    |                                                            |         |                                         |
|---------|------------|------------------|--------------------------------------------------------------------|-------------------------------------------------------------|------------------------------------|------------------------------------------------------------|---------|-----------------------------------------|
| BA39100 | 2019       | Haematology      | Extramedullary granulocytic sarcoma                                | Invasive mucormycosis                                       | Yes                                | Meropenem, Tigecycline<br>Teicoplanin<br>Polymyxin B       | 3 days  | 501<br>Recovered<br>502                 |
| BA10334 | April 2019 | Gastroenterology | Persistent rise of temperature, Recurrent vomiting, Loss of weight | Disseminated Tuberculosis, Sepsis, Pleural effusion         | Yes, Treated elsewhere for 10 days | Cefoperazone- sulbactam, Meropenem, Colistin<br>Vancomycin | 10 days | 503<br>Succumbed to death<br>504        |
| BA1602  | 2019       | Surgery          | Carcinoma ascending colon                                          | Anastomotic leak with fecal peritonitis, MODS, fever, Cough | Yes                                | Polymyxin B<br>Meropenem, Teicoplanin<br>Tigecycline       | 16 days | 505<br>Succumbed to death<br>506<br>507 |

508 GVHD: Graft Versus Host Disease

509  
510  
511  
512  
513  
514  
515  
516  
517  
518  
519  
520  
521  
522  
523  
524  
525  
526  
527  
528

529 **Table 2:** Phenotypic and genotypic characteristics obtained using hybrid genome assembly, of four ST2096 Indian MDR hypervirulent *K. pneumoniae* in  
 530 comparison with the previously reported isolates with hybrid plasmid  
 531

| Isolate ID                                          | BA10835                                                                                          | BA27935                                                                                         | BP3636                                                                                                                                       | BA32040                                                                   | Lam et al., 2019                                                                      | Turton et al., 2019                                                     |                                                                                                                                                                                                                    |
|-----------------------------------------------------|--------------------------------------------------------------------------------------------------|-------------------------------------------------------------------------------------------------|----------------------------------------------------------------------------------------------------------------------------------------------|---------------------------------------------------------------------------|---------------------------------------------------------------------------------------|-------------------------------------------------------------------------|--------------------------------------------------------------------------------------------------------------------------------------------------------------------------------------------------------------------|
| MLST                                                | ST2096                                                                                           | ST2096                                                                                          | ST2096                                                                                                                                       | ST2096                                                                    | ST15                                                                                  | ST147*                                                                  | ST383*                                                                                                                                                                                                             |
| Accession numbers                                   | CP053765 - CP053770                                                                              | CP058798-CP058806                                                                               | CP053771 – CP053780                                                                                                                          | JAARNO010000001.1 to JAARNO010000005.1                                    | ERR2866472<br>ERR2866473                                                              | NZ_MZMY01000000<br>CP040724.1                                           | CP034200.2                                                                                                                                                                                                         |
| Meropenem MIC                                       | 128 µg/ml                                                                                        | 4 µg/ml                                                                                         | 64 µg/ml                                                                                                                                     | ≤0.5µg/ml                                                                 | NA                                                                                    | NA                                                                      | NA                                                                                                                                                                                                                 |
| Chromosomal AMR genes                               | <i>aac(6')-Ib-cr, bla<sub>SHV</sub>, bla<sub>OXA-1</sub>, fosA, dfrA1</i>                        | <i>aac(6')-Ib-cr, bla<sub>OXA-1</sub>, bla<sub>SHV</sub>, fosA, dfrA1</i>                       | <i>bla<sub>SHV</sub>, fosA, dfrA1</i>                                                                                                        | <i>aac(6')-Ib-cr, bla<sub>SHV</sub>, bla<sub>OXA-1</sub>, fosA, dfrA1</i> | <i>bla<sub>SHV-5</sub>, fosA,</i>                                                     | <i>bla<sub>SHV-67</sub>, fosA,</i>                                      | <i>bla<sub>SHV-26</sub>, fosA,</i>                                                                                                                                                                                 |
| Chromosomal virulence genes                         | <i>fyuA, irp1, kfuABC, mrkACFJ, ybtAEPQSTUX</i>                                                  | <i>fyuA, irp1, kfuABC, mrkACFJ, ybtAEPQSTUX</i>                                                 | <i>fyuA, irp1, irp2, kfuABC, mrkABCFHJI, ybtAEPQSTUX</i>                                                                                     | <i>fyuA, irp1, kfuABC, mrkABCFHJI, ybtAEPQSTUX</i>                        | <i>fyuA, irp1, kfuABC, mrkABCFHJI, ybtAEPQSTUX</i>                                    | <i>fyuA, irp1, irp2, mrkABCFHJI, ybtAEPQSTUX</i>                        | <i>mrkABCFHJI, pld1</i>                                                                                                                                                                                            |
| No. of plasmids                                     | 5                                                                                                | 4                                                                                               | 4                                                                                                                                            | 4                                                                         | 4                                                                                     | 3                                                                       | 2                                                                                                                                                                                                                  |
| IncHI1B /IncFIB (pNDM-MAR)<br><br>virulence plasmid | <i>aadA2, armA, bla<sub>TEM-1B</sub>, bla<sub>CTX-M-15</sub>, mphE, msrE, sul1, tetD, dfrA12</i> | <i>aadA2, armA, bla<sub>TEM-1</sub>, bla<sub>CTX-M-15</sub>, mphE, msrE, tetD, dfrA12, sul1</i> | <i>aac(6')-Ib-cr, aadA2, armA, bla<sub>TEM-1A</sub>, bla<sub>CTX-M-15</sub>, bla<sub>OXA-1</sub>, msrE, mphE, sul1, tetD, dfrA12, dfrA14</i> | <i>bla<sub>TEM-1A</sub>, bla<sub>CTX-M-15</sub>, tetD, dfrA14</i>         | <i>Aac3'-IIa, aadA1, bla<sub>TEM</sub>, bla<sub>CTX-M-15</sub>, sul1, dfrA1, sat2</i> | <i>sul1, sul2, armA, dfrA5, mph(A),msr(E), mph(E), aph(3')-Ia</i>       | <i>bla<sub>NDM-5</sub>, bla<sub>CTXM-15</sub>, bla<sub>OXA-9</sub>, qnrS1, bla<sub>TEM-1B</sub>, dfrA5, catA1, sul1, sul2, armA, aph(3)-1a, aph(3)-VI, aac(6)-Ib, aadA1, aac(6)-Ib-cr, mph(A), mph (E), msr(E)</i> |
|                                                     | <i>iucABCD, iutA, rmpA2</i>                                                                      | <i>iucABCD, iutA, rmpA2</i>                                                                     | <i>iucABCD, iutA, rmpA2</i>                                                                                                                  | <i>iucABCD, iutA, rmpA2</i>                                               | <i>iucABCD, rmpA2</i>                                                                 | <i>iutA, iucABCD, rmpA, rmpA2, terABCDEWXYZ, cobW, luxR, pagO, shiF</i> | <i>utA, iucABCD, rmpA/rmpA2, terABCDEWXYZ, cobW, luxR, pagO, shiF</i>                                                                                                                                              |
| IncFIBK                                             | <i>catA1</i>                                                                                     | absent                                                                                          | No AMR gene                                                                                                                                  | No AMR gene                                                               | Absent                                                                                | absent                                                                  | absent                                                                                                                                                                                                             |
| ColKP3                                              | absent                                                                                           | absent                                                                                          | <i>bla<sub>OXA-232</sub></i>                                                                                                                 | absent                                                                    | Absent                                                                                | absent                                                                  | absent                                                                                                                                                                                                             |
| IncFII                                              | <i>aadA2, rmtB, bla<sub>NDM-5</sub>, ermB, mphA, sul1, dfrA12</i>                                | <i>aadA2, rmtB, bla<sub>NDM-5</sub>, bla<sub>TEM-1</sub>, ermB, mphA, sul1, dfrA12</i>          | absent                                                                                                                                       | <i>rmtB, bla<sub>TEM-1B</sub>, ermB, mphA</i>                             | <i>aacA4, bla<sub>OXA-1</sub>, bla<sub>TEM-1</sub>, cat</i>                           | absent                                                                  | absent                                                                                                                                                                                                             |
| Other plasmids                                      | ColRNAI                                                                                          | Col(BS512), ColRNAI                                                                             | ColRNAI                                                                                                                                      | ColRNAI                                                                   | Col4401, ColpVC                                                                       | IncFIB (pQil)                                                           | absent                                                                                                                                                                                                             |

532 MIC: Minimum Inhibitory Concentration determined by broth micro dilution; AMR: antimicrobial resistance; \*Virulence plasmid was a hybrid of IncFII(K)/IncFIB(K)

533  
534

**Table 3: Genotypic characteristics of multidrug resistant hypervirulent *K. pneumoniae* belonging to ST2096 obtained from short read assembly**

535

| Accession number            | <i>rmpA</i> and/ or <i>rmpA2</i> | Capsule type | O antigen | Ybt, ICEKp               | Resistance genes                                                                                                                                             | Plasmids                                                        | Virulence genes                                                |
|-----------------------------|----------------------------------|--------------|-----------|--------------------------|--------------------------------------------------------------------------------------------------------------------------------------------------------------|-----------------------------------------------------------------|----------------------------------------------------------------|
| JAARMH0000000000<br>BA1602  | <i>rmpA2</i> *                   | K64          | O1v1      | <i>ybt14</i> ;<br>ICEKp5 | <i>aac(6)-Ib-cr, aadA2, armA, blaCTX-M-15, blaOXA-1, blaSHV-106, blaTEM-150, dfrA1, dfrA12, dfrA14, fosA6, mphE, msrE, sul1, tetD</i>                        | ColKP3, IncFIBK, incFIB (pNDM-MAR), IncHI1B (pNDM-MAR)          | <i>fyuA, irp1, irp2, kfuAB, aerobactin, mrkABCDFHIJ</i>        |
| JAAQTC0000000000<br>BA25425 | <i>rmpA2</i> *                   | K64          | O1v1      | <i>ybt14</i> ;<br>ICEKp5 | <i>aadA2, ArmA, Sat-2A, blaOXA-1, blaSHV-28, blaTEM-1D, blaOXA-232, bla CTX-M-15, mphE, msrE, sul1, tetD, dfrA1, dfrA12, dfrA14</i>                          | ColKP3, ColRNAI, IncFIBK, IncFIB (pNDM-Mar), IncHI1B (pNDM-MAR) | <i>fyuA, irp1, irp2, kfuABC, mrkABCDFHIJ</i>                   |
| JAAQSG0000000000<br>BA28118 | <i>rmpA2</i> *                   | K64          | O1v1      | <i>ybt14</i> ;<br>ICEKp5 | <i>AadA2, ArmA, blaOXA-1, blaSHV-28, blaTEM-1D, blaOXA-232, blaCTX-M-15, mphE, msrE, sul1, tetD, dfrA12, dfrA14</i>                                          | IncFIBK, IncFIB(pNDM-Mar), ColKP3, ColBS512, IncHI1B (pNDM-MAR) | <i>fyuA, irp1, irp2, aerobactin, kfuABC, mrkABCDFHIJ</i>       |
| JAARNJ0000000000<br>BA39100 | <i>rmpA2</i>                     | K64          | O1v1      | <i>ybt14</i> ;<br>ICEKp5 | <i>aac(6)-Ib-cr, aadA2, armA, sat2A, blaCTX-M-15, blaOXA-1, blaOXA-232, blaSHV-106, blaTEM-1, catB, dfrA1, dfrA12, dfrA14, fosA6, mphE, msrE, sul1, tetD</i> | ColKP3, IncFIBK, IncFIB(pNDM-Mar), IncHI1B (pNDM-MAR)           | <i>fyuA, irp1, irp2, kfuA, kfuC, aerobactin, mrkABCDFHIJ</i>   |
| JAAQSS0000000000<br>BA10334 | <i>rmpA2</i> *                   | K64          | O1v1      | <i>ybt14</i> ;<br>ICEKp5 | <i>aac(6)-Ib-cr, aadA2, armA, blaCTX-M-15, blaOXA-1, blaOXA-232, blaSHV, blaTEM-1A, fosA, msrE, mphE, sul1, tetD, dfrA1, dfrA12, dfrA14</i>                  | ColKP3, IncHI1B (pNDM-MAR), IncFIB (pNDM_MAR), IncFIBK          | <i>fyuA, irp1, irp2, iutA, aerobactin, kfuABC, mrkABCDFHIJ</i> |

548

549 *rmpA2*\*: frameshift mutation in *rmpA2*

550
